# Supplementary material
Source: MDPI journal article supplement (https://www.mdpi.com/2297-8739/11/3/74)
Supplement: s1 [file s1]

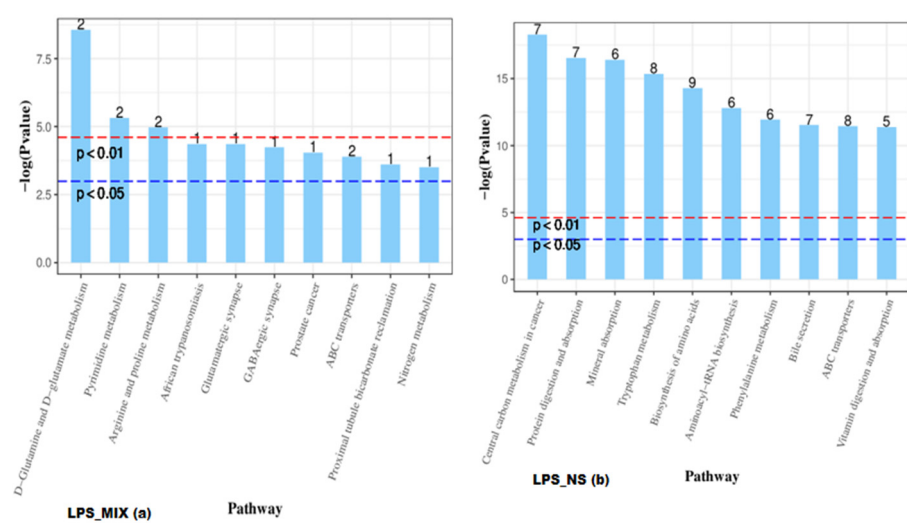

**Figure S1(a, b).** Pathway enrichment analysis bar chart.

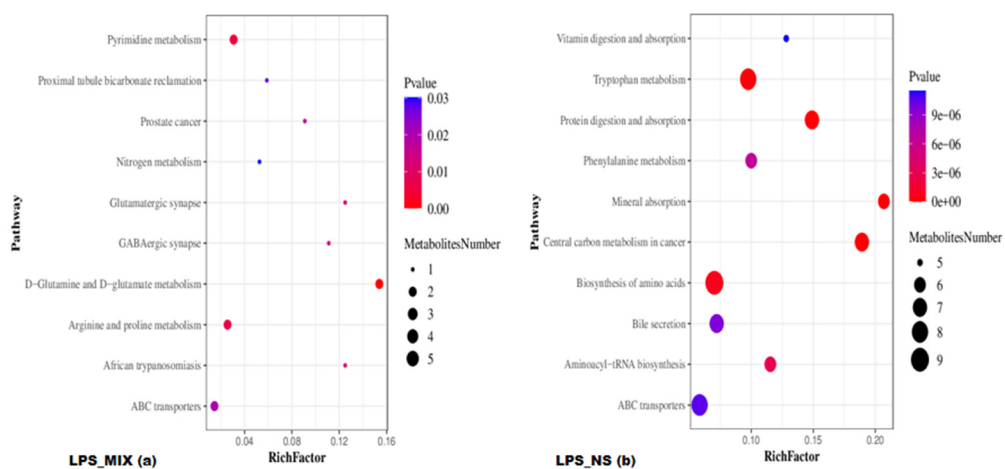

**Figure S2(a, b).** Metabolic pathway enrichment analysis bubble chart.

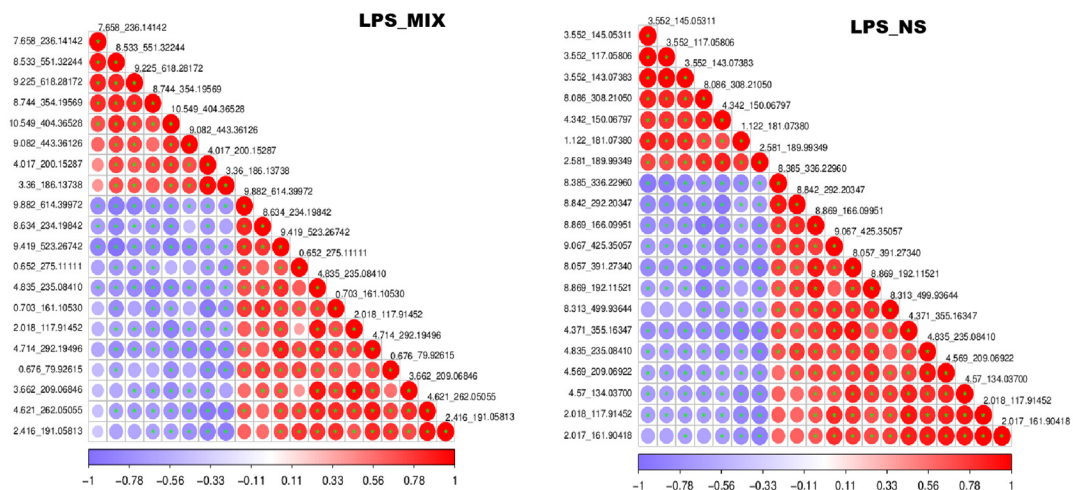

**Figure S3.** Correlation heatmap of differential metabolites LPS\_MIX. (D) Correlation heatmap of differential metabolites LPS\_NS. Red represents positive correlation, blue represents negative correlation, and the darker the color, the greater the absolute value of the correlation coefficient between LPS\_MIX and LPS\_NS. “\*”represent *p-value* <0.05. When the number of differential metabolites is greater than or equal to 20, the first 20 differential metabolites .
